# Supplementary material for: Towards precision medicine based on a continuous deep learning optimization and ensemble approach
Source: Springer Nature journal article supplement (doi:10.1038/s41746-023-00759-1), 2023-02-03
Supplement: 41746_2023_759_MOESM1_ESM.pdf [file 41746_2023_759_MOESM1_ESM.pdf]

## Supplementary Table 1

**a**

| Algorithm         | Performance Testing                                                                                                                                                       | Whether to choose | Reason for selection                                                 |
|-------------------|---------------------------------------------------------------------------------------------------------------------------------------------------------------------------|-------------------|----------------------------------------------------------------------|
| resnet50          | AUC: 0.906 (95% CI 0.873–0.932)                                                                                                                                           | √                 | High test performance                                                |
| resnet50V2        | AUC: 0.885 (95% CI 0.850–0.914)                                                                                                                                           |                   | Similar to the resnet50 model, but with relatively lower performance |
| ResNet101         | As the hardware performance of the experimental computer did not meet the training requirements of the algorithm, the model training could not be successfully completed. |                   |                                                                      |
| ResNet152         | As the hardware performance of the experimental computer did not meet the training requirements of the algorithm, the model training could not be successfully completed. |                   |                                                                      |
| resnext50         | As the hardware performance of the experimental computer did not meet the training requirements of the algorithm, the model training could not be successfully completed. |                   |                                                                      |
| DenseNet121       | AUC: 0.881 (95% CI 0.846–0.911)                                                                                                                                           | √                 | High test performance                                                |
| DenseNet169       | As the hardware performance of the experimental computer did not meet the training requirements of the algorithm, the model training could not be successfully completed. |                   |                                                                      |
| DenseNet201       | As the hardware performance of the experimental computer did not meet the training requirements of the algorithm, the model training could not be successfully completed. |                   |                                                                      |
| inceptionv3       | AUC: 0.894 (95% CI 0.859–0.922)                                                                                                                                           | √                 | High test performance                                                |
| Inceptionresnetv2 | AUC: 0.908 (95% CI 0.875–0.934)                                                                                                                                           | √                 | Highest test performance                                             |
| mobilenetV2       | AUC: 0.647 (95% CI 0.598–0.694)                                                                                                                                           |                   | Poor test performance                                                |
| Xception          | AUC: 0.898 (95% CI 0.864–0.926)                                                                                                                                           | √                 | High test performance                                                |
| unet              | The dataset construction does not meet the requirements of this project                                                                                                   |                   |                                                                      |

**b**

| Algorithm         | AUC (95% CI)        | P-value  |             |             |                   |          |
|-------------------|---------------------|----------|-------------|-------------|-------------------|----------|
|                   |                     | resnet50 | DenseNet121 | inceptionv3 | inceptionresnetv2 | Xception |
| resnet50          | 0.906 (0.873–0.932) |          | 0.13        | 0.43        | 0.88              | 0.61     |
| DenseNet121       | 0.881 (0.845–0.911) |          |             | 0.41        | 0.09              | 0.26     |
| inceptionv3       | 0.894 (0.859–0.922) |          |             |             | 0.30              | 0.74     |
| inceptionresnetv2 | 0.908 (0.875–0.934) |          |             |             |                   | 0.51     |
| Xception          | 0.898 (0.864–0.926) |          |             |             |                   |          |

**c**

| Algorithm         | AUC value for benign and malignant diagnosis | Pathological type diagnosis AUC value | Pathological disease diagnosis AUC value | Total AUC |
|-------------------|----------------------------------------------|---------------------------------------|------------------------------------------|-----------|
| resnet50          | 0.730                                        | 0.665                                 | 0.605                                    | 2.000     |
| DenseNet121       | 0.832                                        | 0.618                                 | 0.642                                    | 2.092     |
| inceptionv3       | 0.803                                        | 0.602                                 | 0.597                                    | 2.002     |
| inceptionresnetv2 | 0.841                                        | 0.635                                 | 0.685                                    | 2.161     |
| Xception          | 0.863                                        | 0.601                                 | 0.587                                    | 2.051     |

**d**

| Algorithm         | Uncropped Image AUC (95% CI) | Cropped Image AUC (95% CI) | P-value |
|-------------------|------------------------------|----------------------------|---------|
| resnet50          | 0.906(0.873–0.93)            | 0.868 (0.831–0.90)         | 0.02    |
| DenseNet121       | 0.881(0.845–0.911)           | 0.836 (0.796–0.871)        | 0.03    |
| inceptionv3       | 0.894 (0.859–0.922)          | 0.867 (0.830–0.899)        | 0.13    |
| inceptionresnetv2 | 0.908(0.875–0.934)           | 0.870 (0.833–0.901)        | 0.03    |
| Xception          | 0.898(0.864–0.926)           | 0.907 (0.874–0.934)        | 0.59    |

**Supplementary Table 1 | Preferred algorithms and image processing methods. (a) Algorithm optimization.** Thirteen common algorithms to develop the diagnosis model, without pre-training or transfer learning. The model was trained by EDS and tested by BMTDS to obtain the receiver operating characteristic curve (ROC) of the diagnosis model. The area under the curve (AUC) was used to compare the diagnostic performance of the models. **(b) Comparison of the five algorithms.** Five algorithms with better diagnostic performance were selected and compared with each other. **(c) Comparison of the comprehensive diagnostic performances of five algorithms.** The models were constructed by the five algorithms with the training data of the first stage; BMTDS, PTTDS, and PDTDS were used to test and compare the diagnostic performance of benign and malignant tumors, pathological types, and pathological diseases, and the algorithm with the best comprehensive performance was selected for the development of CLS. **(d) Comparison of five algorithms and two image processing methods.** The EDS and BMTDS datasets were constructed with and without image cropping (cutting off the text around the ultrasound image), respectively; five algorithms were used to develop the model and tested by BMTDS, and the AUC values obtained by the two approaches were compared. EDS = experimental dataset; BMTDS = benign and malignant diagnostic test dataset; CLS = continuous learning system; PTTDS = pathological type diagnostic test dataset; PDTDS = pathological disease diagnostic test dataset. Use MedCalc Statistical Software ROC curve analysis to calculate 95% confidence interval and significance level p.

**Supplementary Table 2**

| Item category                         |                                               | First | Second | Third | Fourth | Fifth | Sixth |
|---------------------------------------|-----------------------------------------------|-------|--------|-------|--------|-------|-------|
| Total data                            |                                               | 83    | 164    | 249   | 333    | 414   | 499   |
| Training data                         |                                               | 44    | 90     | 130   | 184    | 237   | 283   |
| Benign mass data                      |                                               | 22    | 46     | 69    | 96     | 123   | 150   |
| Malignant mass data                   |                                               | 22    | 44     | 61    | 88     | 114   | 133   |
| Training images                       |                                               | 245   | 506    | 769   | 1014   | 1298  | 1549  |
| Benign and malignant diagnosis        | Benign mass images                            | 120   | 253    | 391   | 522    | 680   | 805   |
|                                       | Malignant mass image                          | 125   | 253    | 378   | 492    | 618   | 744   |
| Pathological Type Diagnostic Image    | Non-invasive carcinoma                        | 13    | 13     | 13    | 13     | 13    | 27    |
|                                       | Invasive non- specialized carcinoma           | 98    | 222    | 341   | 423    | 532   | 644   |
|                                       | Invasive special carcinoma                    | 13    | 23     | 23    | 23     | 64    | 81    |
|                                       | Fibroadenoma                                  | 26    | 68     | 112   | 181    | 250   | 306   |
|                                       | Inflammatory lesions                          | 15    | 38     | 85    | 103    | 118   | 137   |
|                                       | Proliferative lesions                         | 77    | 129    | 167   | 211    | 279   | 313   |
|                                       | Non-fibroadenoma                              | NA    | 18     | 18    | 18     | 33    | 33    |
|                                       | Number of types                               | 6     | 7      | 7     | 7      | 7     | 7     |
| Pathological disease diagnosis images | Ductal carcinoma in situ of the breast        | 13    | 13     | 13    | 13     | 13    | 27    |
|                                       | Invasive ductal carcinoma of the breast       | 95    | 199    | 324   | 406    | 515   | 615   |
|                                       | Fibroadenoma of breast                        | 26    | 68     | 112   | 181    | 250   | 306   |
|                                       | Breast adenopathy                             | 77    | 126    | 151   | 191    | 254   | 278   |
|                                       | Intraductal papilloma of the breast           | NA    | 13     | 13    | 13     | 13    | 26    |
|                                       | Mammary plasma cell mastitis                  | NA    | 24     | 24    | 34     | 34    | 34    |
|                                       | Invasive lobular carcinoma of the breast      | NA    | 14     | 14    | 14     | 14    | 14    |
|                                       | Breast abscess                                | NA    | 14     | 51    | 63     | 78    | 97    |
|                                       | Breast neuroendocrine carcinoma               | NA    | 10     | 10    | 10     | 10    | 10    |
|                                       | Breast cyst                                   | NA    | NA     | 16    | 16     | 16    | 35    |
|                                       | Intraductal papillary carcinoma of the breast | NA    | NA     | NA    | 10     | 25    | 25    |
|                                       | Medullary Breast Cancer                       | NA    | NA     | NA    | 11     | 11    | 11    |
|                                       | Fibroepithelial tumor of the breast           | NA    | NA     | NA    | NA     | 11    | 11    |
|                                       | Borderline phyllodes tumor of the breast      | NA    | NA     | NA    | NA     | NA    | 12    |
|                                       | Mucinous breast cancer                        | NA    | NA     | NA    | NA     | NA    | 10    |
|                                       | Number of diseases                            | 4     | 9      | 10    | 12     | 13    | 15    |

**Supplementary Table 2 | Six-stage training data distribution table.** Pathological type and pathological disease diagnosis images need to be accumulated to ten images before they are automatically classified to construct an image dataset, so the total number of the sixth stage of the two is less than the total number of training images of 1,549 images. NA = not applicable.

**Supplementary Table 3**

**a**

|         | Evaluation indicators |                     |             |             |             |             |             |             |             |             |
|---------|-----------------------|---------------------|-------------|-------------|-------------|-------------|-------------|-------------|-------------|-------------|
|         | Stages                | AUC (95% CI)        | Sensitivity | Specificity | DAPT        | APTI        | MDRPT       | DAPD        | ADPD        | MDRPD       |
| CLS_1   | 1                     | 0.836 (0.761–0.895) | 1.00        | 0.558       | 0.446       | 0.633       | 0.208       | 0.423       | 0.726       | 0.138       |
| CLS_2   | 2                     | 0.826 (0.750–0.887) | 0.857       | 0.716       | 0.485       | 0.572       | 0.354       | 0.515       | 0.759       | 0.115       |
| CLS_3   | 3                     | 0.840 (0.765–0.898) | 0.800       | 0.800       | 0.508       | 0.677       | 0.200       | 0.485       | 0.738       | 0.085       |
| CLS_4   | 4                     | 0.883 (0.815–0.932) | 0.857       | 0.842       | 0.469       | 0.674       | 0.146       | 0.492       | 0.778       | 0.069       |
| CLS_5   | 5                     | 0.908 (0.845–0.952) | 0.943       | 0.737       | 0.554       | 0.674       | 0.200       | 0.500       | 0.767       | 0.100       |
| CLS_6   | 6                     | 0.870 (0.800–0.922) | 0.971       | 0.633       | 0.577       | 0.744       | 0.115       | 0.569       | 0.799       | 0.069       |
| Average |                       | 0.861               | 0.905       | 0.714       | 0.507       | 0.662       | 0.204       | 0.497       | 0.761       | 0.096       |
| 95% CI  |                       | 0.827–0.894         | 0.823–0.987 | 0.604–0.825 | 0.454–0.560 | 0.603–0.722 | 0.118–0.290 | 0.448–0.547 | 0.733–0.789 | 0.067–0.125 |
| DA      |                       | 0.836               | 0.754       | 0.810       | 0.367       | 0.547       | 0.292       | 0.282       | 0.533       | 0.296       |
| CLR     |                       | 2.99%               | 20.03%      | -11.85%     | 38.15%      | 21.02%      | 30.14%      | 76.24%      | 42.78%      | 67.57%      |

**b**

|        |     | Evaluation indicators |             |             |      |      |       |      |      |       | Total score | OM vs NOM |
|--------|-----|-----------------------|-------------|-------------|------|------|-------|------|------|-------|-------------|-----------|
|        |     | AUC                   | Sensitivity | Specificity | DAPT | APTI | MDRPT | DAPD | ADPD | MDRPD |             |           |
| First  | OM  | 16.72                 | 10.0        | 5.58        | 4.45 | 6.33 | 7.92  | 4.23 | 7.26 | 8.62  | 71.10       | 5.40      |
|        | NOM | 15.28                 | 8.00        | 6.95        | 3.69 | 5.36 | 7.08  | 3.85 | 6.85 | 8.62  | 65.70       |           |
| Second | OM  | 16.52                 | 8.57        | 7.16        | 4.85 | 5.72 | 6.46  | 5.15 | 7.59 | 8.85  | 70.87       | 1.05      |
|        | NOM | 16.12                 | 8.00        | 6.74        | 4.00 | 5.92 | 7.54  | 5.08 | 7.50 | 8.92  | 69.82       |           |
| Third  | OM  | 16.80                 | 8.00        | 8.00        | 5.08 | 6.77 | 8.00  | 4.85 | 7.38 | 9.15  | 74.03       | 1.94      |
|        | NOM | 17.60                 | 8.60        | 8.40        | 3.46 | 5.54 | 7.31  | 4.54 | 7.41 | 9.23  | 72.09       |           |
| Fourth | OM  | 17.66                 | 8.57        | 8.42        | 4.69 | 6.74 | 8.54  | 4.92 | 7.78 | 9.31  | 76.63       | 1.59      |
|        | NOM | 17.20                 | 8.00        | 8.02        | 5.08 | 6.97 | 8.54  | 4.85 | 7.38 | 9.00  | 75.04       |           |
| Fifth  | OM  | 18.16                 | 9.43        | 7.37        | 5.54 | 6.74 | 8.00  | 5.00 | 7.67 | 9.00  | 76.91       | -0.46     |
|        | NOM | 18.26                 | 9.43        | 8.00        | 4.15 | 6.82 | 8.46  | 5.08 | 7.94 | 9.23  | 77.37       |           |
| Sixth  | OM  | 17.40                 | 9.71        | 6.63        | 5.77 | 7.44 | 8.85  | 5.69 | 7.99 | 9.31  | 78.79       | -0.78     |
|        | NOM | 17.44                 | 10.0        | 6.63        | 6.23 | 7.77 | 9.15  | 5.92 | 7.74 | 8.69  | 79.57       |           |

**c**

|        |     | Evaluation indicators |             |             |      |      |       |      |      |       | Total score | OM vs NOM |
|--------|-----|-----------------------|-------------|-------------|------|------|-------|------|------|-------|-------------|-----------|
|        |     | AUC                   | Sensitivity | Specificity | DAPT | APTI | MDRPT | DAPD | ADPD | MDRPD |             |           |
| First  | OM  | 15.76                 | 6.81        | 8.38        | 4.50 | 6.28 | 7.78  | 4.44 | 7.63 | 8.72  | 70.30       | 2.46      |
|        | NOM | 15.96                 | 8.26        | 6.94        | 3.17 | 5.63 | 7.83  | 3.94 | 7.39 | 8.72  | 67.84       |           |
| Second | OM  | 16.80                 | 8.26        | 7.03        | 4.89 | 6.06 | 7.00  | 5.00 | 7.72 | 9.06  | 71.82       | -0.30     |
|        | NOM | 16.22                 | 6.96        | 8.29        | 4.56 | 6.26 | 7.72  | 5.17 | 7.83 | 9.11  | 72.12       |           |
| Third  | OM  | 15.82                 | 7.53        | 7.3         | 5.56 | 7.30 | 8.83  | 5.17 | 7.82 | 9.06  | 74.39       | 0.99      |
|        | NOM | 16.26                 | 6.81        | 8.38        | 4.94 | 6.67 | 8.17  | 5.28 | 7.83 | 9.06  | 73.40       |           |
| Fourth | OM  | 17.38                 | 8.41        | 7.84        | 5.72 | 7.26 | 8.56  | 5.72 | 7.89 | 9.17  | 77.95       | 3.45      |
|        | NOM | 16.66                 | 7.83        | 7.48        | 5.61 | 7.11 | 8.39  | 5.11 | 7.59 | 8.72  | 74.50       |           |
| Fifth  | OM  | 16.40                 | 7.97        | 7.57        | 4.83 | 6.41 | 7.67  | 5.33 | 7.66 | 8.89  | 72.73       | -1.62     |
|        | NOM | 17.32                 | 7.10        | 8.74        | 5.06 | 6.61 | 7.83  | 5.17 | 7.69 | 8.83  | 74.35       |           |
| Sixth  | OM  | 16.98                 | 7.39        | 8.46        | 5.90 | 7.17 | 8.11  | 5.28 | 7.69 | 9.17  | 76.15       | -0.61     |
|        | NOM | 16.96                 | 7.39        | 8.38        | 5.89 | 7.26 | 8.28  | 5.72 | 7.82 | 9.06  | 76.76       |           |

d

|        |     | Evaluation indicators |             |             |      |      |       |      |      |       | Total score | OM vs NOM |
|--------|-----|-----------------------|-------------|-------------|------|------|-------|------|------|-------|-------------|-----------|
|        |     | AUC                   | Sensitivity | Specificity | DAPT | APTI | MDRPT | DAPD | ADPD | MDRPD |             |           |
| First  | OM  | 13.74                 | 7.73        | 5.76        | 3.95 | 5.55 | 7.28  | 3.46 | 6.67 | 7.78  | 61.92       | 1.03      |
|        | NOM | 13.52                 | 8.18        | 5.42        | 3.83 | 5.39 | 6.67  | 3.83 | 6.40 | 7.65  | 60.89       |           |
| Second | OM  | 16.12                 | 6.67        | 8.21        | 4.35 | 6.20 | 7.76  | 3.53 | 6.20 | 8.24  | 67.28       | 2.89      |
|        | NOM | 14.02                 | 7.22        | 6.42        | 4.24 | 6.27 | 7.76  | 3.53 | 6.69 | 8.24  | 64.39       |           |
| Third  | OM  | 18.34                 | 9.26        | 7.90        | 5.71 | 6.98 | 7.98  | 5.12 | 7.80 | 9.29  | 78.38       | 3.07      |
|        | NOM | 17.10                 | 9.63        | 6.84        | 5.24 | 6.83 | 8.10  | 4.64 | 7.64 | 9.29  | 75.31       |           |
| Fourth | OM  | 16.06                 | 9.62        | 6.36        | 4.94 | 6.91 | 8.64  | 4.69 | 7.80 | 9.38  | 74.40       | -0.59     |
|        | NOM | 16.98                 | 8.46        | 7.46        | 4.94 | 7.04 | 8.77  | 4.32 | 7.76 | 9.26  | 74.99       |           |
| Fifth  | OM  | 17.16                 | 8.50        | 8.77        | 4.82 | 6.55 | 8.35  | 3.41 | 6.75 | 8.82  | 73.13       | 1.90      |
|        | NOM | 17.54                 | 8.00        | 8.62        | 4.47 | 5.88 | 7.29  | 3.88 | 6.84 | 8.71  | 71.23       |           |

e

|         |   | Evaluation indicators |         |             |             |         |         |         |         |         |           |
|---------|---|-----------------------|---------|-------------|-------------|---------|---------|---------|---------|---------|-----------|
|         |   | Stage                 | AUC     | Sensitivity | Specificity | DAPT    | APTI    | MDRPT   | DAPD    | ADPD    | MDRPD     |
| CLS_1   | 1 | 16.72                 | 10      | 5.58        | 4.45        | 6.33    | 7.92    | 4.23    | 7.26    | 8.62    | 71.10     |
| CLS_2   | 2 | 16.52                 | 8.57    | 7.16        | 4.85        | 5.72    | 6.46    | 5.15    | 7.59    | 8.85    | 70.87     |
| CLS_3   | 3 | 16.8                  | 8       | 8           | 5.08        | 6.77    | 8       | 4.85    | 7.38    | 9.15    | 74.03     |
| CLS_4   | 4 | 17.66                 | 8.57    | 8.42        | 4.69        | 6.74    | 8.54    | 4.92    | 7.78    | 9.31    | 76.63     |
| CLS_5   | 5 | 18.16                 | 9.43    | 7.37        | 5.54        | 6.74    | 8       | 5       | 7.67    | 9       | 76.91     |
| CLS_6   | 6 | 17.4                  | 9.71    | 6.63        | 5.77        | 7.44    | 8.85    | 5.69    | 7.99    | 9.31    | 78.79     |
| Average |   | 17.2                  | 9.0     | 7.2         | 5.1         | 6.6     | 8.0     | 5.0     | 7.6     | 9.0     | 74.7      |
| 95% CI  |   | 16.5–17.9             | 8.2–9.9 | 6.1–8.3     | 4.5–5.6     | 6.0–7.2 | 7.1–8.8 | 4.5–5.5 | 7.3–7.9 | 8.8–9.3 | 71.3–78.2 |
| r       |   | 0.77                  | 0.12    | 0.33        | 0.87        | 0.81    | 0.64    | 0.78    | 0.86    | 0.80    | 0.97      |

**Supplementary Table 3 | CLS adopts OITDS, ETDS, and ATDS test results. (a) CLS adopts OITDS test results. (b) Comprehensive evaluation and comparison of the OM and NOM obtained in six stages of CLS using the OITDS test.** A positive number means OM is higher than NOM, and a negative number means OM is lower than NOM. The average score of OM 6 stages was  $74.7 \pm 1.1$ . The average score of NOM 6 stages was  $73.3 \pm 1.3$ . **(c) Comprehensive evaluation and comparison of the OM and NOM obtained in six stages of CLS using the ETDS test.** A positive number means OM is higher than NOM, and a negative number means OM is lower than NOM. The average score of OM six stages was  $73.9 \pm 1.2$ . The average score of NOM six stages was  $73.1 \pm 1.2$ . **(d) Comprehensive evaluation and comparison of the OM and NOM obtained in six stages of CLS using the ATDS test.** A positive number means OM is higher than NOM, and a negative number means OM is lower than NOM. The average score of OM 6 stages was  $71.0 \pm 2.9$ . The average score of NOM 6 stages was  $69.4 \pm 2.9$ . **(e) OM obtained in six stages of CLS comprehensively evaluated by the OITDS test and its correlation with stage training.** r is the correlation coefficient between each stage and other indicators. OM = optimization model; NOM = non-optimal model; OITDS = organization internal test dataset; AUC = area under the curve; CLS = continuous learning system; DA = physician average; CLR = CLS lift rate. CLS = continuous learning system; DAPT = diagnostic accuracy of pathological type; APTI = accuracy of pathological type identification; MDRPT = missed diagnosis rate of pathological type; DAPD = diagnostic accuracy of pathological diseases; ADPD = accuracy of differentiating pathological diseases; MDRPD = missed diagnosis rate of pathological diseases; ATDS = add test dataset; ETDS = external test dataset.

**Supplementary Table 4**

**a**

|              | Evaluation indicators |       |                    |             |             |             |             |             |             |             |             |
|--------------|-----------------------|-------|--------------------|-------------|-------------|-------------|-------------|-------------|-------------|-------------|-------------|
|              | Years                 | Level | AUC (95% CI)       | Sensitivity | Specificity | DAPT        | APTI        | MDRPT       | DAPD        | ADPD        | MDRPD       |
| Physician 1  | 3                     | PL    | 0.95 (0.893–0.978) | 0.89        | 0.89        | 0.54        | 0.70        | 0.15        | 0.58        | 0.80        | 0.12        |
| Physician 2  | 4                     | IL    | 0.86 (0.788–0.915) | 0.71        | 0.94        | 0.58        | 0.72        | 0.20        | 0.45        | 0.70        | 0.18        |
| Physician 3  | 7                     | IL    | 0.92 (0.854–0.957) | 0.91        | 0.82        | 0.52        | 0.66        | 0.21        | 0.41        | 0.63        | 0.20        |
| Physician 4  | 16                    | AL    | 0.88 (0.812–0.931) | 0.83        | 0.78        | 0.56        | 0.67        | 0.25        | 0.48        | 0.70        | 0.21        |
| Physician 5  | 15                    | PL    | 0.87 (0.795–0.920) | 0.94        | 0.67        | 0.49        | 0.61        | 0.22        | 0.42        | 0.67        | 0.23        |
| Physician 6  | 2                     | PL    | 0.85 (0.775–0.905) | 0.83        | 0.76        | 0.51        | 0.62        | 0.27        | 0.45        | 0.63        | 0.25        |
| Physician 7  | 5                     | PL    | 0.89 (0.819–0.935) | 0.74        | 0.93        | 0.36        | 0.63        | 0.18        | 0.30        | 0.60        | 0.25        |
| Physician 8  | 8                     | IL    | 0.83 (0.751–0.887) | 0.66        | 0.89        | 0.35        | 0.65        | 0.11        | 0.22        | 0.61        | 0.09        |
| Physician 9  | 8                     | IL    | 0.89 (0.817–0.934) | 0.69        | 0.93        | 0.34        | 0.62        | 0.13        | 0.25        | 0.58        | 0.22        |
| Physician 10 | 12                    | IL    | 0.85 (0.775–0.905) | 0.77        | 0.83        | 0.45        | 0.58        | 0.28        | 0.35        | 0.51        | 0.40        |
| Physician 11 | 16                    | AL    | 0.89 (0.819–0.936) | 0.69        | 0.97        | 0.21        | 0.55        | 0.16        | 0.08        | 0.53        | 0.17        |
| Physician 12 | 11                    | AL    | 0.81 (0.731–0.873) | 0.89        | 0.58        | 0.36        | 0.54        | 0.24        | 0.19        | 0.48        | 0.27        |
| Physician 13 | 10                    | IL    | 0.84 (0.766–0.899) | 0.74        | 0.80        | 0.31        | 0.49        | 0.35        | 0.28        | 0.46        | 0.46        |
| Physician 14 | 6                     | PL    | 0.74 (0.660–0.817) | 0.66        | 0.77        | 0.30        | 0.45        | 0.42        | 0.32        | 0.60        | 0.25        |
| Physician 15 | 16                    | AL    | 0.82 (0.738–0.878) | 0.83        | 0.69        | 0.38        | 0.55        | 0.34        | 0.25        | 0.35        | 0.49        |
| Physician 16 | 2                     | PL    | 0.79 (0.704–0.853) | 0.63        | 0.82        | 0.25        | 0.42        | 0.44        | 0.25        | 0.55        | 0.29        |
| Physician 17 | 21                    | AL    | 0.75 (0.665–0.820) | 0.60        | 0.85        | 0.29        | 0.49        | 0.33        | 0.15        | 0.41        | 0.32        |
| Physician 18 | 7                     | PL    | 0.84 (0.769–0.901) | 0.74        | 0.82        | 0.18        | 0.44        | 0.35        | 0.04        | 0.35        | 0.42        |
| Physician 19 | 16                    | IL    | 0.82 (0.744–0.882) | 0.60        | 0.86        | 0.25        | 0.43        | 0.40        | 0.09        | 0.35        | 0.35        |
| Physician 20 | 6                     | PL    | 0.79 (0.709–0.856) | 0.74        | 0.79        | 0.37        | 0.43        | 0.49        | 0.32        | 0.49        | 0.35        |
| Physician 21 | 14                    | IL    | 0.67 (0.586–0.753) | 0.74        | 0.62        | 0.08        | 0.23        | 0.62        | 0.05        | 0.19        | 0.70        |
| Average      | 9.8                   |       | 0.836              | 0.754       | 0.810       | 0.367       | 0.547       | 0.292       | 0.282       | 0.533       | 0.296       |
| 95% CI       | 7.3–12.3              |       | 0.807–0.865        | 0.708–0.80  | 0.763–0.858 | 0.304–0.427 | 0.492–0.601 | 0.233–0.352 | 0.214–0.351 | 0.467–0.599 | 0.232–0.360 |

**b**

|              | Evaluation indicators |       |           |             |             |         |         |         |         |         |         |             |
|--------------|-----------------------|-------|-----------|-------------|-------------|---------|---------|---------|---------|---------|---------|-------------|
|              | Years                 | Level | AUC       | Sensitivity | Specificity | DAPT    | APTI    | MDRPT   | DAPD    | ADPD    | MDRPD   | Total score |
| Physician 1  | 3                     | PL    | 18.94     | 8.86        | 8.95        | 5.38    | 7.00    | 8.46    | 5.77    | 7.96    | 8.77    | 80.10       |
| Physician 2  | 4                     | IL    | 17.20     | 7.14        | 9.37        | 5.77    | 7.15    | 8.00    | 4.46    | 7.04    | 8.23    | 74.36       |
| Physician 3  | 7                     | IL    | 18.32     | 9.14        | 8.21        | 5.15    | 6.56    | 7.92    | 4.08    | 6.33    | 8.00    | 73.72       |
| Physician 4  | 16                    | AL    | 17.60     | 8.28        | 7.79        | 5.62    | 6.69    | 7.54    | 4.77    | 7.03    | 7.92    | 73.23       |
| Physician 5  | 15                    | PL    | 17.32     | 9.43        | 6.74        | 4.92    | 6.05    | 7.77    | 4.23    | 6.68    | 7.69    | 70.84       |
| Physician 6  | 2                     | PL    | 16.98     | 8.29        | 7.58        | 5.08    | 6.15    | 7.31    | 4.46    | 6.31    | 7.54    | 69.70       |
| Physician 7  | 5                     | PL    | 17.72     | 7.73        | 9.26        | 3.62    | 6.28    | 8.23    | 3.00    | 5.96    | 7.54    | 69.34       |
| Physician 8  | 8                     | IL    | 16.54     | 6.57        | 8.95        | 3.54    | 6.46    | 8.92    | 2.23    | 6.13    | 9.08    | 68.42       |
| Physician 9  | 8                     | IL    | 17.70     | 6.86        | 9.26        | 3.38    | 6.18    | 8.69    | 2.46    | 5.76    | 7.77    | 68.06       |
| Physician 10 | 12                    | IL    | 16.96     | 7.71        | 8.32        | 4.46    | 5.85    | 7.15    | 3.46    | 5.14    | 6.00    | 65.05       |
| Physician 11 | 16                    | AL    | 17.74     | 6.86        | 9.68        | 2.08    | 5.54    | 8.38    | 0.85    | 5.27    | 8.31    | 64.70       |
| Physician 12 | 11                    | AL    | 16.18     | 8.86        | 5.79        | 3.62    | 5.41    | 7.62    | 1.92    | 4.79    | 7.31    | 61.50       |
| Physician 13 | 10                    | IL    | 16.80     | 7.43        | 8.00        | 3.08    | 4.87    | 6.46    | 2.85    | 4.64    | 5.38    | 59.51       |
| Physician 14 | 6                     | PL    | 14.88     | 6.57        | 7.68        | 3.00    | 4.54    | 5.85    | 3.23    | 6.04    | 7.54    | 59.32       |
| Physician 15 | 16                    | AL    | 16.30     | 8.29        | 6.95        | 3.85    | 5.49    | 6.62    | 2.46    | 3.50    | 5.08    | 58.53       |
| Physician 16 | 2                     | PL    | 15.70     | 6.29        | 8.19        | 2.46    | 4.15    | 5.62    | 2.54    | 5.54    | 7.08    | 57.56       |
| Physician 17 | 21                    | AL    | 14.96     | 6.00        | 8.53        | 2.92    | 4.92    | 6.69    | 1.54    | 4.14    | 6.85    | 56.55       |
| Physician 18 | 7                     | PL    | 16.86     | 7.43        | 8.21        | 1.85    | 4.38    | 6.46    | 0.38    | 3.50    | 5.77    | 54.85       |
| Physician 19 | 16                    | IL    | 16.42     | 6.00        | 8.63        | 2.54    | 4.33    | 6.00    | 3.49    | 0.92    | 6.46    | 54.79       |
| Physician 20 | 6                     | PL    | 12.88     | 7.43        | 6.36        | 3.69    | 4.28    | 5.08    | 3.23    | 4.87    | 6.46    | 54.29       |
| Physician 21 | 14                    | IL    | 13.48     | 7.43        | 6.21        | 0.85    | 2.31    | 3.77    | 0.54    | 1.92    | 3.00    | 39.50       |
| Average      | 9.76                  |       | 16.55     | 7.55        | 8.00        | 3.70    | 5.50    | 7.10    | 3.00    | 5.20    | 7.00    | 63.50       |
| 95% CI       | 7.3–12.3              |       | 15.9–17.2 | 7.1–8.0     | 7.5–8.5     | 3.1–4.3 | 4.9–6.0 | 6.5–7.7 | 2.3–3.6 | 4.4–6.0 | 6.4–7.7 | 59.3–67.7   |
| r            |                       |       | -0.15     | -0.1        | -0.16       | -0.25   | -0.22   | -0.12   | -0.34   | -0.49   | -0.32   | -0.33       |

**Supplementary Table 4 | 21 physicians using OITDS test results and comparison. (a) Participating test physician OITDS test results. (b) Comprehensive evaluation results of 21 participating physicians and their correlation with working years.**

The above results have been converted according to the evaluation criteria and sorted according to the total score from high to low. The average result is  $64.5 \pm 3.3$  for the primary,  $63.0 \pm 4.1$  for intermediate, and  $63.0 \pm 2.9$  for senior.  $r$  = correlation coefficient; OITDS = organization internal test dataset; AUC = area under the curve; DAPT = diagnostic accuracy of pathological type; APTI = accuracy of pathological type identification; MDRPT = missed diagnosis rate of pathological type; DAPD = diagnostic accuracy of pathological diseases; ADPD = accuracy of differentiating pathological diseases; MDRPD = missed diagnosis rate of pathological diseases; PL = primary level; IL = intermediate level; AL = advanced level; CLS = continuous learning system.

**Supplementary Table 5**

**a**

|        | Index                | OM                  | NOM                 | P-value |
|--------|----------------------|---------------------|---------------------|---------|
| First  | AUC (95% CI)         | 0.836 (0.761–0.895) | 0.764 (0.681–0.834) | 0.02    |
|        | Sensitivity (95% CI) | 100 (90–100)        | 80 (63.1–91.6)      | 0.14    |
|        | Specificity (95% CI) | 55.8 (45.2–66.0)    | 69.5 (59.2–78.5)    | 0.21    |
|        | DAPT                 | (58/130) 44.6%      | (48/130) 36.9%      | 0.33    |
|        | APTI                 | (247/390) 63.3%     | (209/390) 53.6%     | 0.08    |
|        | MDRPT                | (27/130) 20.8%      | (38/130) 29.2%      | 0.17    |
|        | DAPD                 | (55/130) 42.3%      | (50/130) 38.5%      | 0.63    |
|        | ADPD                 | (566/780) 72.6%     | (534/780) 68.5%     | 0.34    |
|        | MDRPD                | (18/130) 13.8%      | (18/130) 13.8%      | 1.0     |
| Second | AUC (95% CI)         | 0.826 (0.750–0.887) | 0.806 (0.727–0.870) | 0.53    |
|        | Sensitivity (95% CI) | 85.7 (69.7–95.2)    | 80 (63.1–91.6)      | 0.64    |
|        | Specificity (95% CI) | 71.6 (61.4–80.4)    | 67.4 (57.0–76.6)    | 0.67    |
|        | DAPT                 | (63/130) 48.5%      | (52/130) 40%        | 0.31    |
|        | APTI                 | (223/390) 57.2%     | (231/390) 59.2%     | 0.71    |
|        | MDRPT                | (46/130) 35.4%      | (32/130) 24.6%      | 0.11    |
|        | DAPD                 | (67/130) 51.5%      | (66/130) 50.8%      | 0.93    |
|        | ADPD                 | (592/780) 75.9%     | (585/780) 75%       | 0.84    |
|        | MDRPD                | (15/130) 11.5%      | (14/130) 10.8%      | 0.85    |
| Third  | AUC (95% CI)         | 0.840 (0.765–0.898) | 0.88 (0.81–0.93)    | 0.21    |
|        | Sensitivity (95% CI) | 80.0 (63.1–91.6)    | 85.7 (69.7–95.2)    | 0.64    |
|        | Specificity (95% CI) | 80.0 (69.4–86.6)    | 84.2 (75.3–90.9)    | 0.69    |
|        | DAPT                 | (66/130) 50.8%      | (45/130) 34.6%      | 0.05    |
|        | APTI                 | (264/390) 67.7%     | (216/390) 55.4%     | 0.03    |
|        | MDRPT                | (26/130) 20.0%      | (35/130) 26.9%      | 0.25    |
|        | DAPD                 | (63/130) 48.5%      | (59/130) 45.4%      | 0.72    |
|        | ADPD                 | (576/780) 73.8%     | (578/780) 74.1%     | 0.95    |
|        | MDRPD                | (11/130) 8.5%       | (10/130) 7.7%       | 0.83    |
| Fourth | AUC (95% CI)         | 0.883 (0.815–0.932) | 0.86 (0.788–0.914)  | 0.46    |
|        | Sensitivity (95% CI) | 85.7 (69.7–95.2)    | 80.0 (63.1–91.6)    | 0.64    |
|        | Specificity (95% CI) | 84.2 (75.3–90.9)    | 80.2 (72.9–89.2)    | 0.88    |
|        | DAPT                 | (61/130) 46.9%      | (66/130) 50.8%      | 0.66    |
|        | APTI                 | (263/390) 67.4%     | (272/390) 69.7%     | 0.70    |
|        | MDRPT                | (19/130) 14.6%      | (19/130) 14.6%      | 1.0     |
|        | DAPD                 | (64/130) 49.2%      | (63/130) 48.5%      | 0.93    |
|        | ADPD                 | (607/780) 77.8%     | (576/780) 73.8%     | 0.37    |
|        | MDRPD                | (9/130) 6.9%        | (13/130) 10%        | 0.39    |
| Fifth  | AUC (95% CI)         | 0.908 (0.845–0.952) | 0.913 (0.851–0.956) | 0.82    |
|        | Sensitivity (95% CI) | 94.3 (80.8–99.3)    | 94.3 (80.8–99.3)    | 1.0     |
|        | Specificity (95% CI) | 73.7 (63.6–82.2)    | 80.0 (69.4–86.6)    | 0.69    |
|        | DAPT                 | (72/130) 55.4%      | (54/130) 41.5%      | 0.11    |
|        | APTI                 | (263/390) 67.4%     | (266/390) 68.2%     | 0.90    |
|        | MDRPT                | (26/130) 20%        | (20/130) 15.4%      | 0.38    |
|        | DAPD                 | (65/130) 50%        | (66/130) 50.8%      | 0.93    |
|        | ADPD                 | (598/780) 76.7%     | (619/780) 79.4%     | 0.55    |
|        | MDRPD                | (13/130) 10%        | (10/130) 7.7%       | 0.53    |
| Sixth  | AUC (95% CI)         | 0.870 (0.80–0.922)  | 0.872 (0.802–0.924) | 0.98    |
|        | Sensitivity (95% CI) | 97.1 (85.1–99.9)    | 100 (90.0–100.0)    | 0.83    |
|        | Specificity (95% CI) | 66.3 (55.9–75.7)    | 66.3 (55.9–75.7)    | 1.0     |
|        | DAPT                 | (75/130) 57.7%      | (81/130) 62.3%      | 0.63    |
|        | APTI                 | (290/390) 74.4%     | (303/390) 77.7%     | 0.59    |
|        | MDRPT                | (15/130) 11.5%      | (11/130) 8.5%       | 0.43    |
|        | DAPD                 | (74/130) 56.9%      | (77/130) 59.2%      | 0.81    |
|        | ADPD                 | (623/780) 79.9%     | (604/780) 77.4%     | 0.59    |
|        | MDRPD                | (9/130) 6.9%        | (17/130) 13.1%      | 0.12    |



**b**

|        | Index                | OM                  | NOM                 | P-value |
|--------|----------------------|---------------------|---------------------|---------|
| First  | AUC (95% CI)         | 0.788 (0.721–0.845) | 0.798 (0.732–0.854) | 0.69    |
|        | Sensitivity (95% CI) | 68.1 (55.8–78.8)    | 82.6 (71.6–90.7)    | 0.22    |
|        | Specificity (95% CI) | 83.8 (75.6–90.1)    | 69.4 (59.9–77.8)    | 0.23    |
|        | DAPT                 | (81/180) 45%        | (57/180) 31.7%      | 0.04    |
|        | APTI                 | (339/540) 62.8%     | (304/540) 56.3%     | 0.17    |
|        | MDRPT                | (40/180) 22.2%      | (39/180) 21.7%      | 0.91    |
|        | DAPD                 | (80/180) 44.4%      | (71/180) 39.4%      | 0.46    |
|        | ADPD                 | (824/1080) 76.3%    | (798/1080) 73.9%    | 0.52    |
| Second | MDRPD                | (23/180) 12.8%      | (23/180) 12.8%      | 1.0     |
|        | AUC (95% CI)         | 0.840 (0.779–0.891) | 0.811 (0.746–0.865) | 0.18    |
|        | Sensitivity (95% CI) | 82.6 (71.6–90.7)    | 69.6 (57.3–80.1)    | 0.29    |
|        | Specificity (95% CI) | 70.3 (60.9–78.6)    | 82.9 (74.6–89.4)    | 0.29    |
|        | DAPT                 | (88/180) 48.9%      | (82/180) 45.6%      | 0.65    |
|        | APTI                 | (327/540) 60.6%     | (338/540) 62.6%     | 0.67    |
|        | MDRPT                | (54/180) 30%        | (41/180) 22.8%      | 0.18    |
|        | DAPD                 | (90/180) 50%        | (93/180) 51.7%      | 0.82    |
| Third  | ADPD                 | (834/1080) 77.2%    | (846/1080) 78.3%    | 0.77    |
|        | MDRPD                | (17/180) 9.4%       | (16/180) 8.9%       | 0.86    |
|        | AUC (95% CI)         | 0.791 (0.724–0.848) | 0.813 (0.748–0.867) | 0.32    |
|        | Sensitivity (95% CI) | 75.4 (63.5–84.9)    | 68.1 (55.8–78.8)    | 0.56    |
|        | Specificity (95% CI) | 73.0 (63.7–81.0)    | 84.0 (75.6–90.1)    | 0.38    |
|        | DAPT                 | (100/180) 55.6%     | (89/180) 49.4%      | 0.42    |
|        | APTI                 | (394/540) 73.0%     | (360/540) 66.7%     | 0.22    |
|        | MDRPT                | (21/180) 11.7%      | (33/180) 18.3%      | 0.10    |
| Fourth | DAPD                 | (93/180) 51.7%      | (95/180) 52.8%      | 0.88    |
|        | ADPD                 | (845/1080) 78.2%    | (846/1080) 78.3     | 0.98    |
|        | MDRPD                | (17/180) 9.4%       | (17/180) 9.4%       | 1.0     |
|        | AUC (95% CI)         | 0.869 (0.810–0.914) | 0.833 (0.771–0.885) | 0.16    |
|        | Sensitivity (95% CI) | 84.1 (73.3–91.8)    | 78.3 (66.7–87.3)    | 0.64    |
|        | Specificity (95% CI) | 78.4(69.6 – 85.6)   | 74.8 (65.6–82.5)    | 0.81    |
|        | DAPT                 | (103/180) 57.2%     | (101/180) 56.1%     | 0.89    |
|        | APTI                 | (392/540) 72.6%     | (384/540) 71.1%     | 0.77    |
| Fifth  | MDRPT                | (26/180) 14.4%      | (29/180) 16.1%      | 0.69    |
|        | DAPD                 | (103/180) 57.2%     | (92/180) 51.1%      | 0.43    |
|        | ADPD                 | (852/1080) 78.9%    | (820/1080) 75.9%    | 0.43    |
|        | MDRPD                | (15/180) 8.3%       | (23/180) 12.8%      | 0.19    |
|        | AUC (95% CI)         | 0.820 (0.756–0.873) | 0.866 (0.808–0.912) | 0.04    |
|        | Sensitivity (95% CI) | 79.7 (68.3–88.4)    | 71.0 (58.8–81.3)    | 0.46    |
|        | Specificity (95% CI) | 75.7 (66.6–83.3)    | 87.4 (79.7–92.9)    | 0.39    |
|        | DAPT                 | (87/180) 48.3%      | (91/180) 50.6%      | 0.76    |
| Sixth  | APTI                 | (346/540) 64.1%     | (357/540) 66.1%     | 0.68    |
|        | MDRPT                | (42/180) 23.3%      | (39/180) 21.7%      | 0.74    |
|        | DAPD                 | (96/180) 53.3%      | (93/180) 51.7%      | 0.83    |
|        | ADPD                 | (827/1080) 76.6%    | (831/1080) 76.9%    | 0.92    |
|        | MDRPD                | (20/180) 11.1%      | (21/180) 11.7%      | 0.88    |
|        | AUC (95% CI)         | 0.849 (0.788–0.898) | 0.848 (0.787–0.897) | 0.96    |
|        | Sensitivity (95% CI) | 73.9 (61.9–83.7)    | 73.9 (61.9–83.7)    | 1.0     |
|        | Specificity (95% CI) | 84.6 (77.6–91.5)    | 83.8 (75.6–90.1)    | 0.88    |
| Sixth  | DAPT                 | (106/180) 58.9%     | (106/180) 58.9%     | 1.0     |
|        | APTI                 | (387/540) 71.7%     | (392/540) 72.6%     | 0.86    |
|        | MDRPT                | (34/180) 18.9%      | (31/180) 17.2%      | 0.71    |
|        | DAPD                 | (95/180) 52.8%      | (103/180) 57.2%     | 0.57    |
|        | ADPD                 | (830/1080) 76.9%    | (845/1080) 78.2%    | 0.71    |
|        | MDRPD                | (15/180) 8.3%       | (17/180) 9.4%       | 0.72    |

c

|        | Index                | OM                  | NOM                 | P-value |
|--------|----------------------|---------------------|---------------------|---------|
| First  | AUC (95% CI)         | 0.687 (0.574–0.785) | 0.676 (0.563–0.776) | 0.82    |
|        | Sensitivity (95% CI) | 77.3 (54.6–92.2)    | 81.8 (59.7–94.8)    | 0.69    |
|        | Specificity (95% CI) | 57.6 (44.1–70.4)    | 54.2 (40.8–67.3)    | 0.71    |
|        | DAPT                 | (32/81) 39.5%       | (31/81) 38.3%       | 0.9     |
|        | APTI                 | (135/243) 55.6%     | (131/243) 53.9%     | 0.81    |
|        | MDRPT                | (22/81) 27.2%       | (27/81) 33.3%       | 0.48    |
|        | DAPD                 | (28/81) 34.6%       | (31/81) 38.3%       | 0.70    |
|        | ADPD                 | (324/486) 66.7%     | (311/486) 64%       | 0.61    |
| Second | MDRPD                | (18/81) 22.2%       | (19/81) 23.5%       | 0.87    |
|        | AUC (95% CI)         | 0.806 (0.705–0.883) | 0.701 (0.592–0.796) | 0.04    |
|        | Sensitivity (95% CI) | 66.7 (41.0–86.7)    | 72.2 (46.5–90.3)    | 0.67    |
|        | Specificity (95% CI) | 82.1 (70.8–90.4)    | 64.2 (51.5–75.5)    | 0.14    |
|        | DAPT                 | (37/85) 43.5%       | (36/85) 42.4%       | 0.91    |
|        | APTI                 | (158/255) 62.0%     | (160/255) 62.7%     | 0.91    |
|        | MDRPT                | (19/85) 22.4%       | (19/85) 22.4%       | 1.0     |
|        | DAPD                 | (30/85) 35.3%       | (30/85) 35.3%       | 1.0     |
| Third  | ADPD                 | (316/510) 62.0%     | (341/510) 66.9%     | 0.33    |
|        | MDRPD                | (15/85) 17.7%       | (15/85) 17.7%       | 1.0     |
|        | AUC (95% CI)         | 0.917 (0.836–0.966) | 0.855 (0.761–0.922) | 0.04    |
|        | Sensitivity (95% CI) | 92.6 (75.7–99.1)    | 96.3 (81.0–99.9)    | 0.83    |
|        | Specificity (95% CI) | 79.0 (66.1–88.6)    | 68.4 (54.8–80.1)    | 0.36    |
|        | DAPT                 | (48/84) 57.1%       | (44/84) 52.4%       | 0.68    |
|        | APTI                 | (176/252) 69.8%     | (172/252) 68.3%     | 0.83    |
|        | MDRPT                | (17/84) 20.2%       | (16/84) 19.1%       | 0.86    |
| Fourth | DAPD                 | (43/84) 51.2%       | (39/84) 46.4%       | 0.66    |
|        | ADPD                 | (393/504) 78.0%     | (385/504) 76.4%     | 0.77    |
|        | MDRPD                | (6/84) 7.1%         | (6/84) 7.1%         | 1.0     |
|        | AUC (95% CI)         | 0.803 (0.70–0.883)  | 0.849 (0.752–0.919) | 0.21    |
|        | Sensitivity (95% CI) | 96.2 (80.4–99.9)    | 84.6 (65.1–95.6)    | 0.41    |
|        | Specificity (95% CI) | 63.6 (49.6–76.2)    | 74.6 (61.0–85.3)    | 0.35    |
|        | DAPT                 | (40/81) 49.4%       | (40/81) 49.4%       | 1.0     |
|        | APTI                 | (168/243) 69.1%     | (171/243) 70.4%     | 0.87    |
| Fifth  | MDRPT                | (11/81) 13.6%       | (10/81) 12.3%       | 0.83    |
|        | DAPD                 | (38/81) 46.9%       | (35/81) 43.2%       | 0.73    |
|        | ADPD                 | (379/486) 78.0%     | (377/486) 77.6%     | 0.94    |
|        | MDRPD                | (5/81) 6.2%         | (6/81) 7.4%         | 0.76    |
|        | AUC (95% CI)         | 0.858 (0.765–0.924) | 0.877 (0.787–0.938) | 0.69    |
|        | Sensitivity (95% CI) | 85.0 (62.1–96.8)    | 80.0 (56.3–94.3)    | 0.70    |
|        | Specificity (95% CI) | 87.7 (77.2–94.5)    | 86.2 (75.3–93.5)    | 0.94    |
|        | DAPT                 | (41/85) 48.2%       | (38/85) 44.7%       | 0.74    |
| Fifth  | APTI                 | (167/255) 65.5%     | (150/255) 58.8%     | 0.34    |
|        | MDRPT                | (14/85) 16.5%       | (23/85) 27.1%       | 0.14    |
|        | DAPD                 | (29/85) 34.1%       | (33/85) 38.8%       | 0.61    |
|        | ADPD                 | (344/510) 67.5%     | (349/510) 68.4%     | 0.85    |
|        | MDRPD                | (10/85) 11.8%       | (11/85) 12.9%       | 0.83    |

**Supplementary Table 5 | Comparison of OM and NOM results using OITDS, ETDS, and ATDS respectively. (a) Comparison of the OM and NOM obtained by six stages of CLS using the OITDS test results.** The highest AUC value was for the fifth stage. AUC for stage one OM was higher than AUC for NOM. In the third stage, the APTI of OM is higher than that of NOM ( $p < 0.05$ ), and the comparison of other indicators is  $p > 0.05$ . **(b) Comparison of the OM and NOM obtained by six stages of CLS using ETDS test results.** **(c) Comparison of the OM and NOM with ATDS test results obtained in five stages of CLS.** The data for each model testing stage is the total number of data in the next stage, ATDS includes from phases 2 to 6 (81, 85, 84, 81, and 85). OITDS = organization internal test dataset; ETDS = external test dataset; ATDS = add test dataset; CLS = continuous learning system; OM = optimization model; NOM = non-optimal model; AUC = area under the curve; DAPT = diagnostic accuracy of pathological type; APTI = accuracy of pathological type identification; MDRPT = missed diagnosis rate of pathological type; DAPD = diagnostic accuracy of pathological diseases; ADPD = accuracy of differentiating pathological diseases; MDRPD = missed diagnosis rate of pathological diseases. Use comparison of two rates test to calculate the p-value of incidence rate ratio.

**Supplementary Table 6**

| Benign and malignant                    | Pathological type                                   | Pathological disease                              |
|-----------------------------------------|-----------------------------------------------------|---------------------------------------------------|
| Benign                                  | Non-fibroadenoma                                    | Mammary haemangioma                               |
|                                         |                                                     | Spindle cell tumor of the breast                  |
|                                         |                                                     | Intraductal papilloma of the breast               |
|                                         |                                                     | Fibroepithelial tumor of the breast               |
|                                         |                                                     | Breast adenomyoepithelial tumor                   |
|                                         | Fibroadenoma                                        | Breast lipoma                                     |
|                                         |                                                     | Fibroadenoma of breast                            |
|                                         | Similar to fibroadenoma                             | Breast hamartoma                                  |
|                                         |                                                     | Breast lactation adenoma                          |
|                                         |                                                     | Breast tubular adenoma                            |
|                                         |                                                     | Benign phyllodes tumor of the breast              |
|                                         | Inflammatory lesions                                | Acute suppurative mastitis                        |
|                                         |                                                     | Granulomatous lobular mastitis                    |
|                                         |                                                     | IgG4-related sclerosing mastitis                  |
|                                         |                                                     | Thrombophlebitis of the breast (Mondor's disease) |
|                                         |                                                     | Tuberculous mastitis                              |
|                                         |                                                     | Mammary plasma cell mastitis                      |
|                                         | Proliferative lesions                               | Breast abscess                                    |
|                                         |                                                     | Breast cyst                                       |
|                                         |                                                     | Breast adenopathy                                 |
| Radial sclerosing lesions of the breast |                                                     |                                                   |
| Malignant                               | Non-invasive carcinoma                              | Ductal carcinoma in situ of the breast            |
|                                         | Early invasive carcinoma                            | lobular carcinoma in situ                         |
|                                         |                                                     | Invasive special carcinoma                        |
|                                         | Intraductal papillary carcinoma of the breast       |                                                   |
|                                         | Intracystic papillary carcinoma                     |                                                   |
|                                         | Medullary Breast Cancer                             |                                                   |
|                                         | Medullary breast carcinoma with cystic degeneration |                                                   |
|                                         | Adenoid cystic carcinoma of the breast              |                                                   |
|                                         | Mucinous breast cancer                              |                                                   |
|                                         | Invasive cribriform carcinoma of the breast         |                                                   |
|                                         | Paget disease of the nipple                         |                                                   |
|                                         | Breast lymphoma                                     |                                                   |
|                                         | Papillary leiomyosarcoma                            |                                                   |
|                                         | Invasive non-specialized carcinoma                  | Malignant mesenchymal tumor of the breast         |
|                                         |                                                     | Malignant spindle cell tumor of the breast        |
|                                         |                                                     | Breast neuroendocrine carcinoma                   |
|                                         |                                                     | Invasive ductal carcinoma of the breast           |
|                                         |                                                     | Invasive lobular carcinoma of the breast          |
|                                         |                                                     | Borderline phyllodes tumor of the breast          |
|                                         |                                                     | Malignant phyllodes tumor of the breast           |

**Supplementary Table 6| Pathological types and classification of diseases.**

## Supplementary Table 7

| Index       | Calculated                                                                                                                                                                                                                                                                                                                                                                                                                                                                        | Weight score | Actual score                |
|-------------|-----------------------------------------------------------------------------------------------------------------------------------------------------------------------------------------------------------------------------------------------------------------------------------------------------------------------------------------------------------------------------------------------------------------------------------------------------------------------------------|--------------|-----------------------------|
| Sensitivity | Sensitivity is selected according to the Youden index of the ROC curve                                                                                                                                                                                                                                                                                                                                                                                                            | 10           | Calculated value * 10       |
| Specificity | Specificity was chosen according to the Youden index of the ROC curve                                                                                                                                                                                                                                                                                                                                                                                                             | 10           | Calculated value * 10       |
| AUC value   | Area under the ROC curve                                                                                                                                                                                                                                                                                                                                                                                                                                                          | 20           | Calculated value * 20       |
| DAPT        | Accurate number of first diagnosis cases/total number of cases by pathological type                                                                                                                                                                                                                                                                                                                                                                                               | 10           | Calculated value * 10       |
| APTI        | (Number of accurate first-diagnosed cases of pathological type * 3 + Number of accurate second-diagnosed cases of pathological type * 2 + Number of accurate third-diagnosed cases of pathological type * 1)/Number of total cases * 3                                                                                                                                                                                                                                            | 10           | Calculated value * 10       |
| MDRPT       | The number of wrong cases/total number of cases in the three pathological types                                                                                                                                                                                                                                                                                                                                                                                                   | 10           | 10 – Calculated value * 10  |
| DAPD        | Accurate number of first diagnosed cases of pathological diseases/total number of cases                                                                                                                                                                                                                                                                                                                                                                                           | 10           | Calculated value * 10       |
| ADPD        | (The number of accurate first diagnosis cases of pathological diseases * 6 + number of accurate second diagnosis cases of pathological diseases * 5 + number of accurate third diagnosis cases of pathological diseases * 4 + number of accurate fourth diagnosis cases of pathological diseases * 3 + fifth diagnosis of pathological diseases an accurate number of cases * 2 + accurate number of sixth diagnosis cases of pathological disease * 1)/total number of cases * 6 | 10           | Calculated value * 10       |
| MDRPD       | The number of wrong cases/total cases of 6 diagnoses of pathological diseases                                                                                                                                                                                                                                                                                                                                                                                                     | 10           | 10 – Calculated value * 10  |
| Total       |                                                                                                                                                                                                                                                                                                                                                                                                                                                                                   | 100          | Add the above actual scores |

**Supplementary Table 7 | Case diagnostic test evaluation criteria.** Because there is no standard for judging the clinical importance of the nine indices, the weighted scores are distributed evenly. Since the total score is 100 points, the extra 10 points are assigned to the AUC value. DAPT = diagnostic accuracy of pathological type; APTI = accuracy of pathological type identification; MDRPT = missed diagnosis rate of pathological type; DAPD = diagnostic accuracy of pathological diseases; ADPD = accuracy of differentiating pathological diseases; MDRPD = missed diagnosis rate of pathological diseases; AUC = area under the curve.

**Supplementary Figure 1**

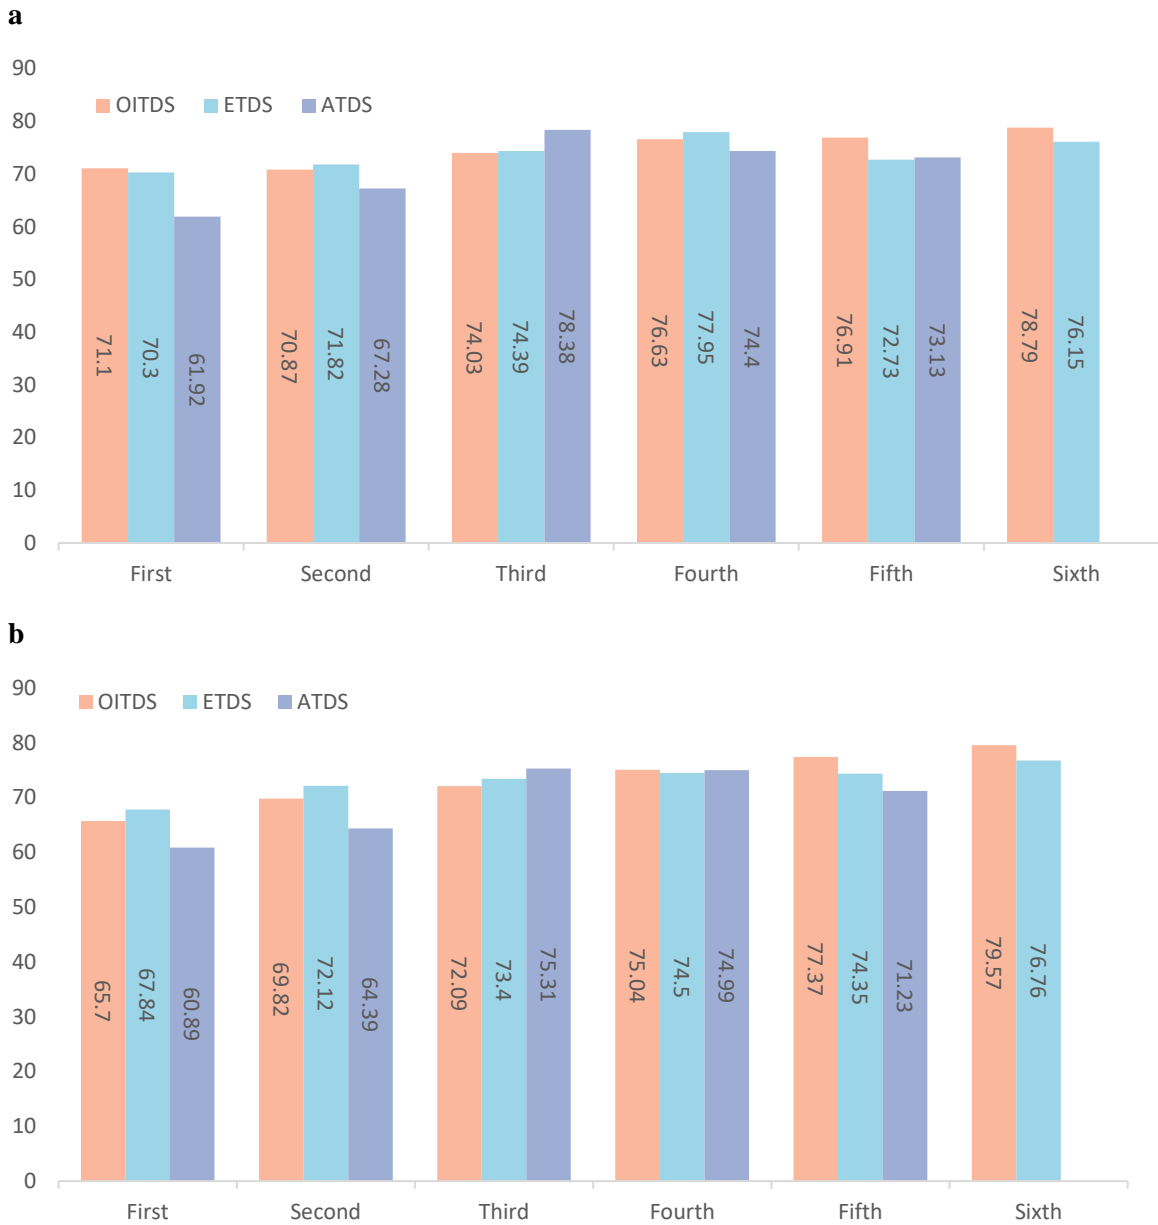

**Supplementary Figure 1 | (a) Comparison of six-stage OM test results for OITDS, ETDS, and ATDS. (b) Comparison of six-stage NOM test results for OITDS, ETDS, and ATDS.** OM = optimization model; NOM = non-optimal model; OITDS = organization internal test dataset; ATDS = add test dataset; ETDS = external test dataset.

## Supplementary Figure 2

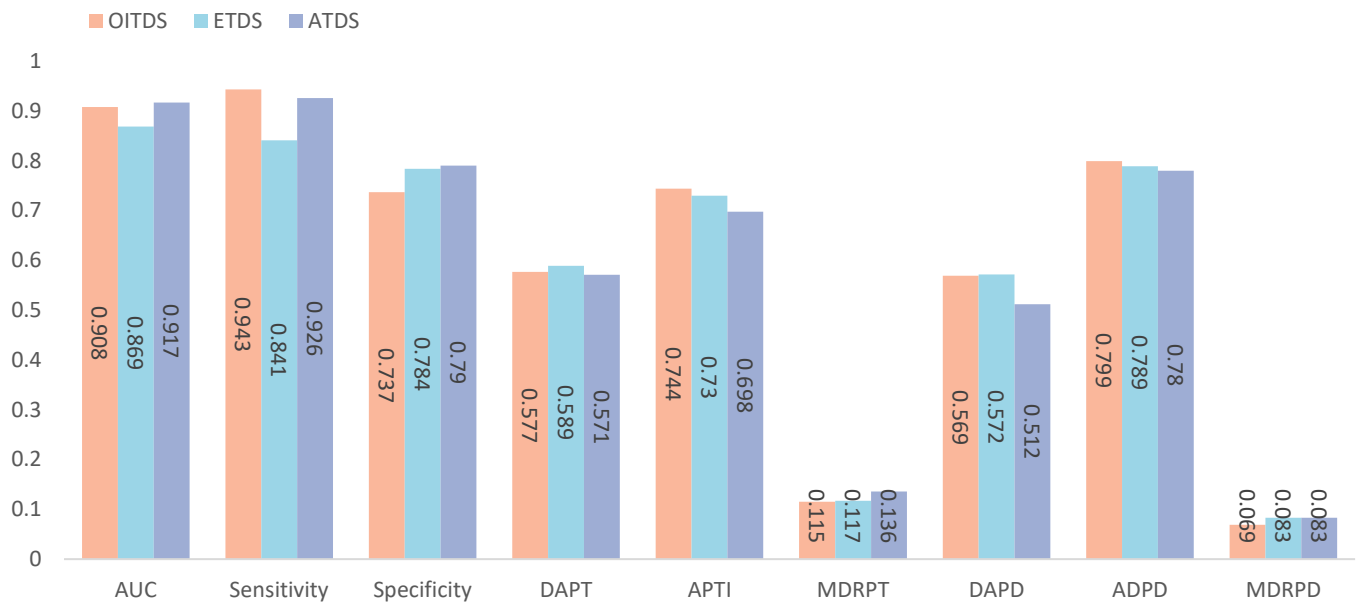

**Supplementary Figure 2 | Comparison of the best results of the OM obtained by CLS six-stage training using OITDS, ETDS, and ATDS tests.** OITDS = organization internal test dataset; ETDS = external test dataset; ATDS = add test dataset; DAPT = diagnostic accuracy of pathological type; APTI = accuracy of pathological type identification; MDRPT = missed diagnosis rate of pathological type; DAPD = diagnostic accuracy of pathological diseases; ADPD = accuracy of differentiating pathological diseases; MDRPD = missed diagnosis rate of pathological diseases.

### Supplementary Figure 3

**a**

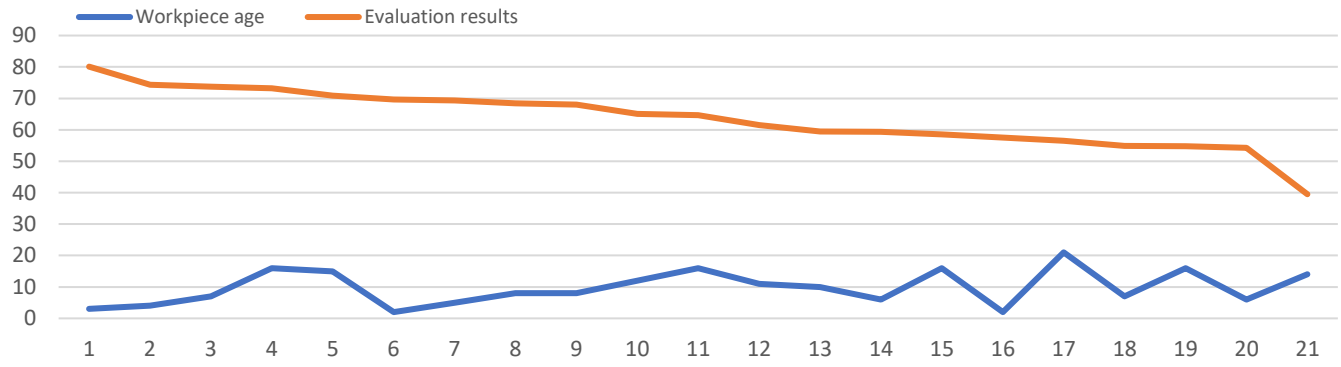

**b**

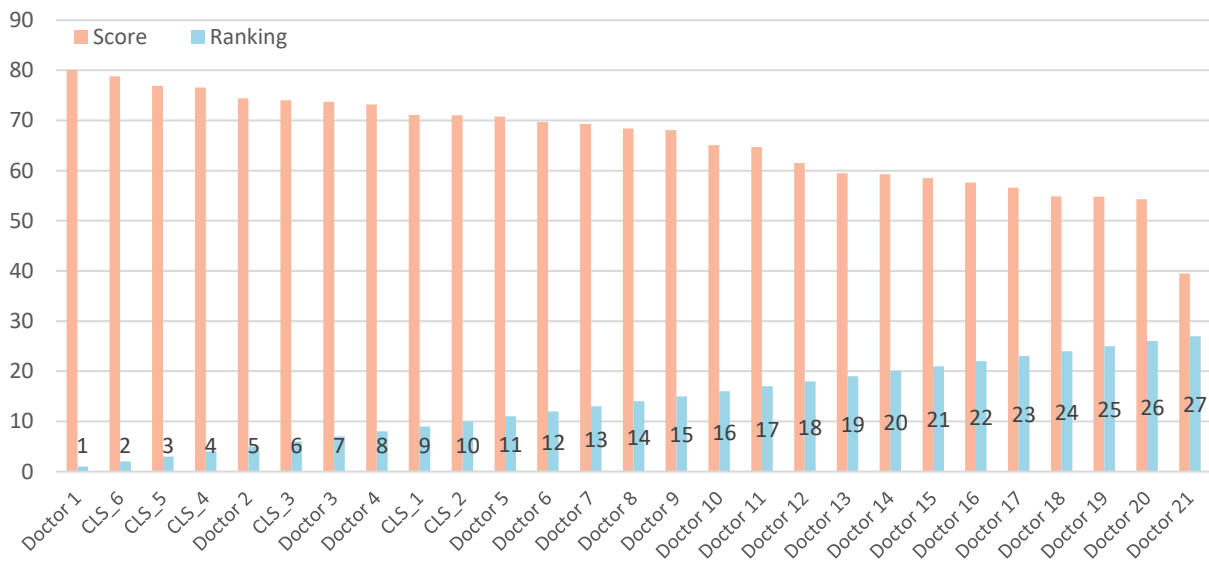

**Supplementary Figure 3 | 21 physicians using OITDS test results and comparison. (a). Physician and CLS diagnostic evaluation rankings. (b) Physician and CLS diagnostic evaluation rankings.**

## Supplementary Figure 4

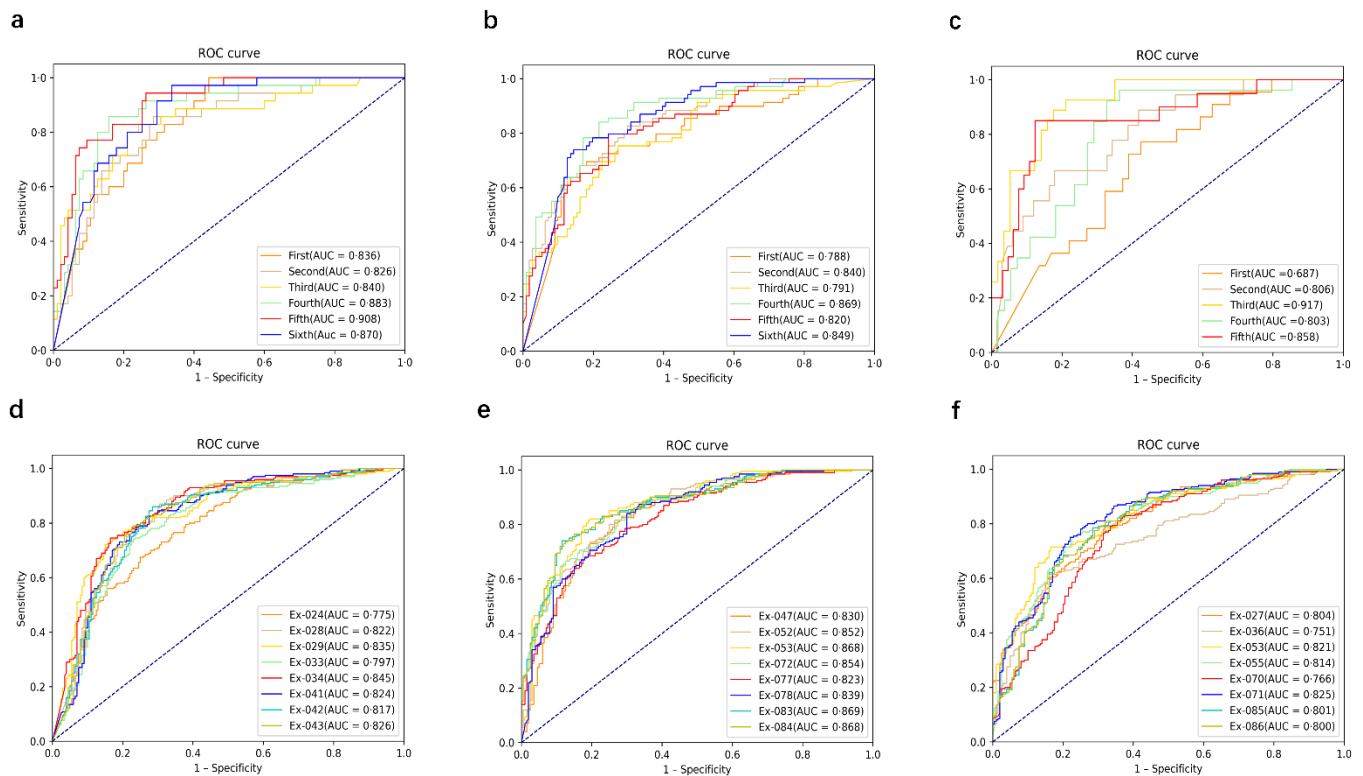

**Supplementary Figure 4 | The sixth stage of CLS testing and optimizing ROC curves.** (a) OM obtained in six stages of CLS using OITDS for testing AUC value comparison. (b) Comparison of AUC values of the OM obtained in six stages of the CLS using the ETDS for testing. (c) Comparison of test AUC values with the ATDS for the OM obtained from CLS training stages 1–5. (d) The ROC curve of the last eight models for the training of the benign and malignant tumor diagnosis models in the sixth stage. (e) The ROC curve of the last eight models for optimal testing of the model training for the diagnosis of the pathological type of the mass in the sixth stage. (f) The ROC curve of the last eight models for optimal testing of the sixth stage mass pathological disease diagnosis model training. CLS = continuous learning system; OM = optimization model; OITDS = organization internal test dataset; AUC = area under the curve; ETDS = external test dataset; ATDS = add test dataset.



## Supplementary Figure 5

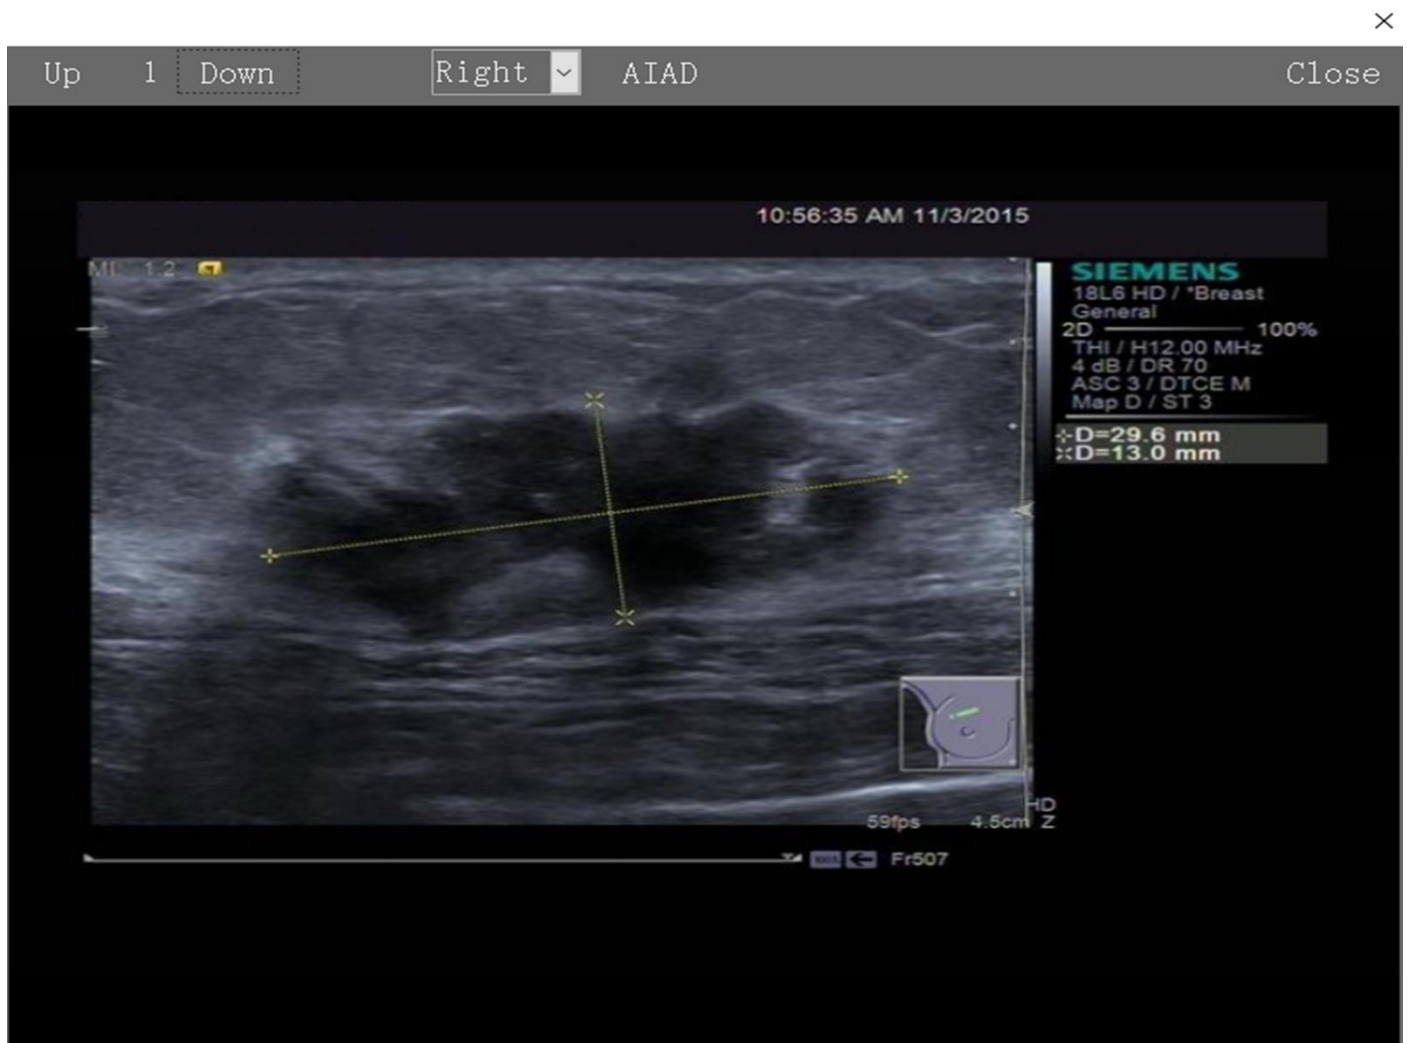

**Supplementary Figure 5 | Ultrasound image for AI-assisted diagnosis.** This image comes from the training data set of this project, and the upper part of the image is designed by the project team.

## Supplementary notes

### Acronyms and their definitions

1. CLS = continuous learning system
2. AutoML = Automated machine learning
3. AI = artificial intelligence
4. BI-RADS = breast imaging report and data system
5. AUC = area under the curve
6. DAPT = diagnostic accuracy of pathological type
7. APTI = accuracy of pathological type identification
8. MDRPT = missed diagnosis rate of pathological type
9. DAPD = diagnostic accuracy of pathological diseases
10. ADPD = accuracy of differentiating pathological diseases
11. MDRPD = missed diagnosis rate of pathological diseases
12. EDS = experimental dataset
13. OITDS = organization internal test dataset
14. OM = optimisation model
15. NOM = nonoptimal model
16. ETDS = external test dataset
17. ATDS = add test dataset
18. US\_PACS = ultrasound picture archiving and communication system
19. DICOM = digital imaging and communications in medicine
20. BMTDS = malignant diagnostic test dataset
21. PTTDS = pathological type diagnostic test dataset
22. PDTDS = pathological disease diagnostic test dataset
23. BMS = benign and malignant set
24. PTS = pathological type set
25. PDS = pathological disease set
26. BM\_OM = benign and malignant diagnostic optimization model
27. BM\_NOM = benign and malignant diagnostic nonoptimal model
28. PT\_OM = pathological type diagnostic optimization model
29. PT\_NOM = pathological type diagnostic nonoptimal model
30. PD\_OM = pathological disease diagnosis optimization model
31. PD\_NOM = pathological disease diagnosis nonoptimal model
